# Supplementary material for: Co3O4 supported by ultrathin-layered graphitic carbon nitride for efficient electrocatalytic evolution of oxygen
Source: Royal Society of Chemistry journal article supplement (doi:10.1039/d4re00020j), 2024-01-01
Supplement: d4re00020j1.pdf [file d4re00020j1.pdf]

## Supporting Information

### **Co<sub>3</sub>O<sub>4</sub> supported by ultrathin-layered graphitic carbon nitride for efficient electrocatalytic evolution of oxygen**

Ruixue Luo<sup>a</sup>, Xi Li<sup>a</sup>, Youping Guo<sup>a</sup> and Renchun Fu<sup>\*a</sup>

### The correlation of the Tafel slope, overpotential and current density

The Tafel slope is an important kinetic parameter in the electrolytic water reaction process, which is used to express the sensitivity of the reaction pathway and reaction potential relative to the electrode potential<sup>1</sup>. The Tafel slope is an inherent property of the electrode material itself, and the magnitude of the Tafel slope value is closely related to the electrolytic water reaction rate in the actual electrolytic water reaction process. In order to make the reaction current density ( $j_0$ ) increases, it is necessary to apply a high overpotential ( $\eta$ ), the expressions are shown below:

$$\eta = a + b \log(j_0) \quad (\text{Eq. S1})$$

where  $\eta$  is the overpotential,  $a$  is a constant,  $b$  is the Tafel slope, and  $j_0$  is the exchange current density. In general, if the overpotential ( $\eta$ ) is smaller, the corresponding current density ( $j$ ) grows faster. The current density ( $j$ ) and overpotential can be described by the known Butler-Volmer equation<sup>2,3</sup>:

$$j = j_0 \left[ \exp\left(\frac{\alpha_a n a F \eta}{RT}\right) + \exp\left(\frac{-\alpha_c n a F \eta}{RT}\right) \right] \quad (\text{Eq. S2})$$

In the above equation,  $j$  is the current density,  $j_0$  is the exchange current density,  $\alpha$  is the charge transfer coefficient,  $n$  is the number of electrons transferred during the electrode reaction,  $F$  is the Faraday constant,  $\eta$  is the activation overpotential,  $R$  is the ideal gas constant,  $T$  represents the Kelvin temperature of the reaction, and the charge transfer coefficient is defined as the proportion of electrical energy used to change the electrochemical reaction rate, and the charge transfer coefficient is controlled by the electron transfer at the electrode electrolyte interface. The charge transfer coefficient is controlled by the electron transfer at the electrode electrolyte interface<sup>4</sup>. Where  $\alpha_a$  is the reduction charge transfer coefficient and  $\alpha_c$  is the oxidation charge transfer coefficient. However, in the specific reaction process, the exact reaction mechanism is difficult to determine, and if the reaction mechanism has been determined, the charge transfer coefficient can be expressed as follows<sup>5</sup>:

$$\alpha_a = \frac{n - \gamma}{\nu} - s\beta \quad (\text{Eq. S3})$$

$$\alpha_c = \frac{\gamma}{\nu} + s\beta \quad (\text{Eq. S4})$$

In the above equation,  $n$  is the total number of electrons transferred in the reaction,  $\gamma$  is the number of electrons transferred before the confirmatory step,  $\nu$  is the number of confirmatory steps occurring in one reaction during the whole reaction,  $S$  is the number of electrons transferred in the confirmatory step and  $\beta$  is the symmetry factor. Then equation (3) is simplified and equation (3) is expressed as follow<sup>6</sup>:

$$j = j_0 \left( \exp\left[\frac{(1 - \beta)F\eta}{RT}\right] - \exp\left[\frac{-\beta F\eta}{RT}\right] \right) \quad (\text{Eq. S5})$$

The Butler-Volmer equation is the sum of the anodic current density (and cathodic current density). However, under high anodic overpotential conditions, the overall current comes mainly from the anodic end, while the

contribution of the cathodic part is negligible. Therefore, the Butler-Volmerr equation can be simplified as:

$$j \approx j_0 \exp \frac{\alpha_a n F \eta}{RT} \quad (\text{Eq. S6})$$

The Tafel equation is obtained by converting the above equation into logarithmic functional form, as shown below:

$$\log(j) = \log(j_0) + \frac{\eta}{b} \text{ or } \eta = a + b \log\left(\frac{j}{j_0}\right) \quad (\text{Eq. S7})$$

### Connection between cyclic voltammetric curves and electrochemically active surface area

The electrochemical active surface area (ECSA) reflects the catalytic reaction area of the catalyst, the number of active sites in the catalyst can be obtained from the ECSA. For electrode materials with high catalytic activity, the value of ECSA is also larger. Since the bilayer capacitance ( $C_{dl}$ ) of a catalyst is positively correlated with its ECSA, the size of its ECSA is usually determined based on the  $C_{dl}$  value of the catalyst. The value of  $C_{dl}$  is first determined by performing cyclic voltammetry tests at different scan rates in the potential range of the non-electrochemical reaction, and based on the test results, the difference between the corresponding current density at a certain potential ( $\Delta j = j_a - j_c$ ), where,  $j_a$  and  $j_c$  are the anodic and cathodic current densities, respectively)<sup>7</sup>, plotted with the scan rate as the variable, and fitted to obtain half of the slope of the line as the  $C_{dl}$  value of the catalyst. the relationship between ECSA and  $C_{dl}$  can be calculated by the following equation:

$$ECSA = C_{dl} / C_s \quad (\text{S8})$$

Where  $C_s$  is the specific capacitance. In order to determine ECSA, the value of the specific capacitance ( $C_s$ ) needs to be determined. Where  $C_s$  is the specific capacitance of a flat surface with 1 cm<sup>2</sup> of real surface area. Here we assume its value is 40  $\mu\text{F}\cdot\text{cm}^{-2}$  per for the flat electrode<sup>8</sup>.

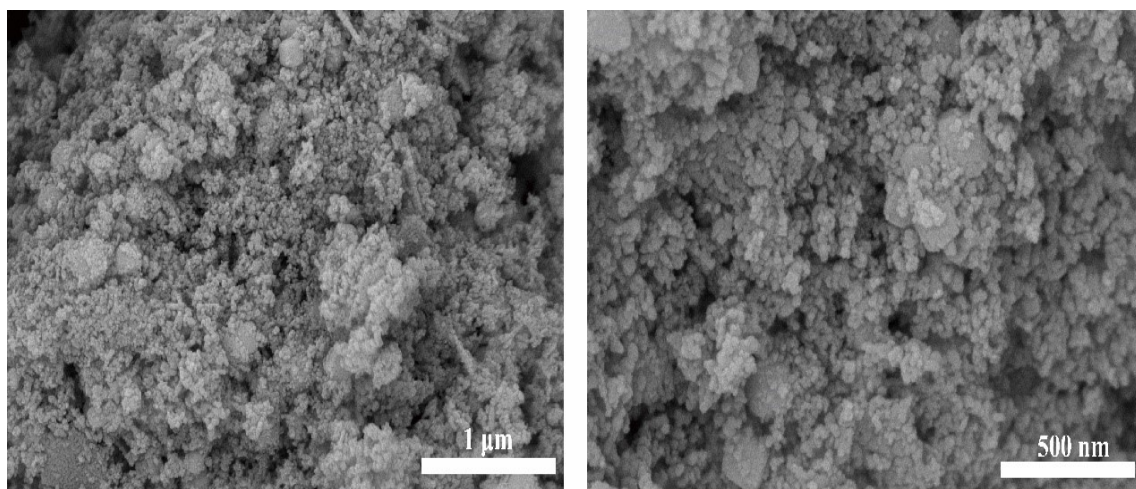

**Fig S1.** SEM images of pristine  $\text{Co}_3\text{O}_4$  with different magnifications.

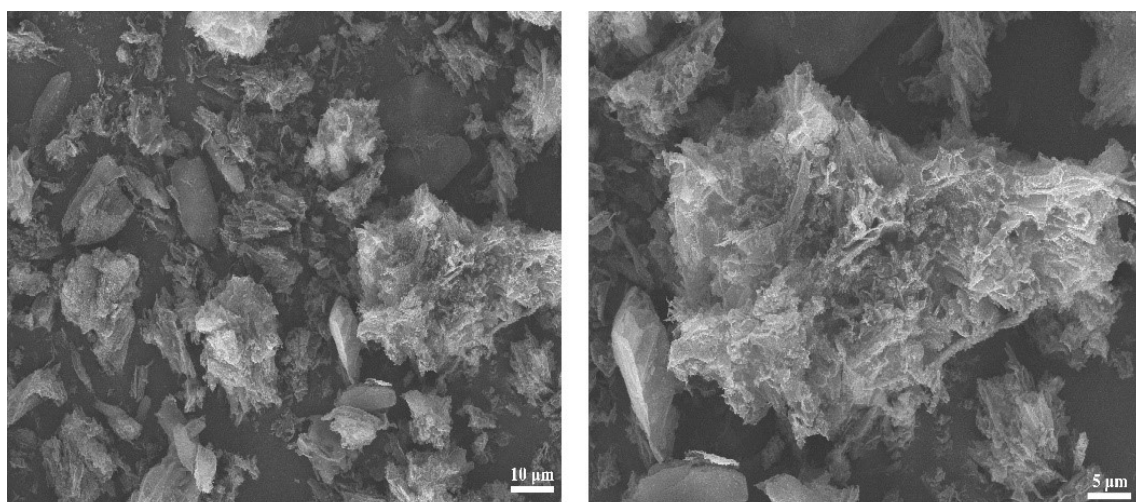

**Fig S2.** SEM images of pristine  $\text{g-C}_3\text{N}_4$  with different magnifications.

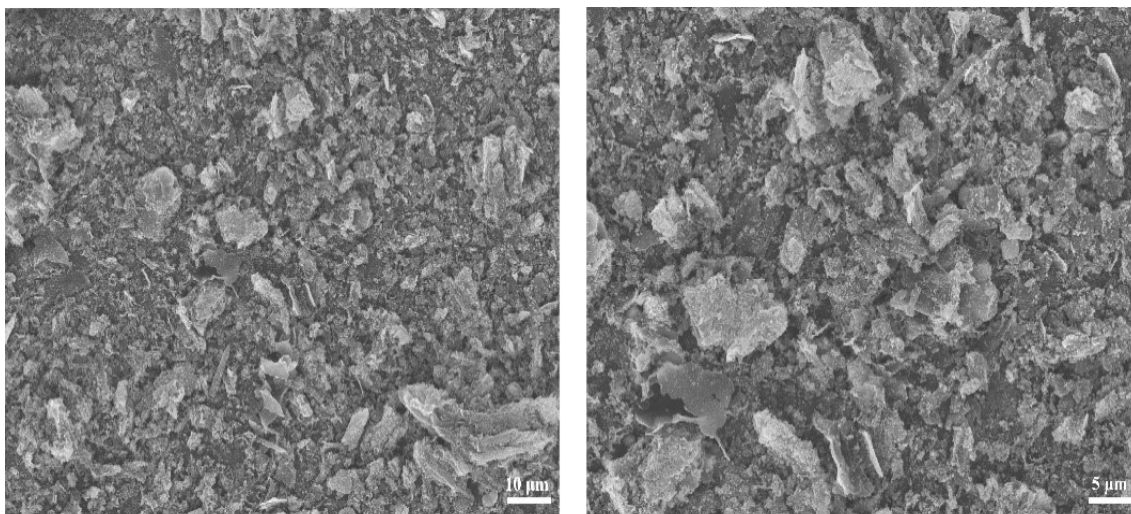

Fig S3. SEM images of  $\text{Co}_3\text{O}_4@\text{g-C}_3\text{N}_4$  composite material with different magnifications.

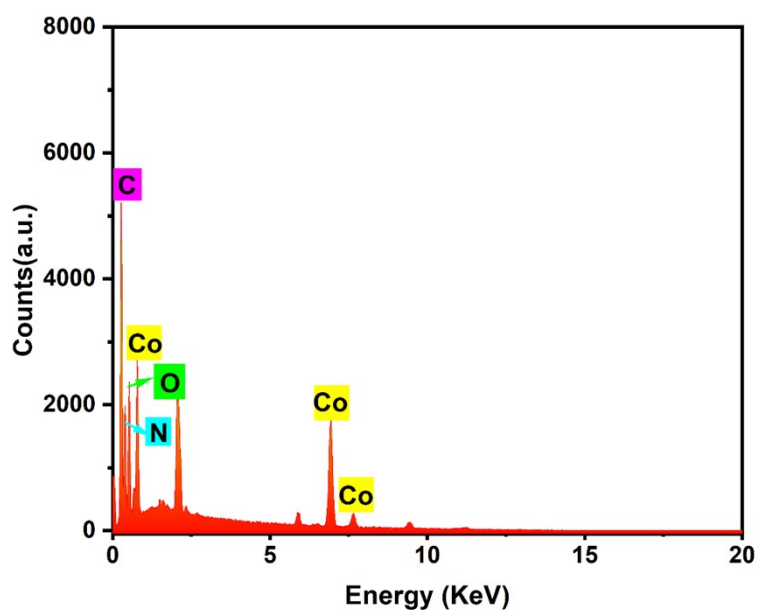

Fig S4. The EDS spectroscopy results of  $\text{Co}_3\text{O}_4@\text{g-C}_3\text{N}_4$  composites.

Table S1. Quantitative results for C, N, O, and Co in  $\text{Co}_3\text{O}_4@\text{g-C}_3\text{N}_4$  from EDS.

| element | wt%    | wt% sigma | At%    |
|---------|--------|-----------|--------|
| C       | 37.80  | 0.36      | 49.72  |
| N       | 27.10  | 0.48      | 30.58  |
| O       | 14.30  | 0.24      | 14.12  |
| Co      | 20.80  | 0.24      | 5.58   |
| Total   | 100.00 |           | 100.00 |

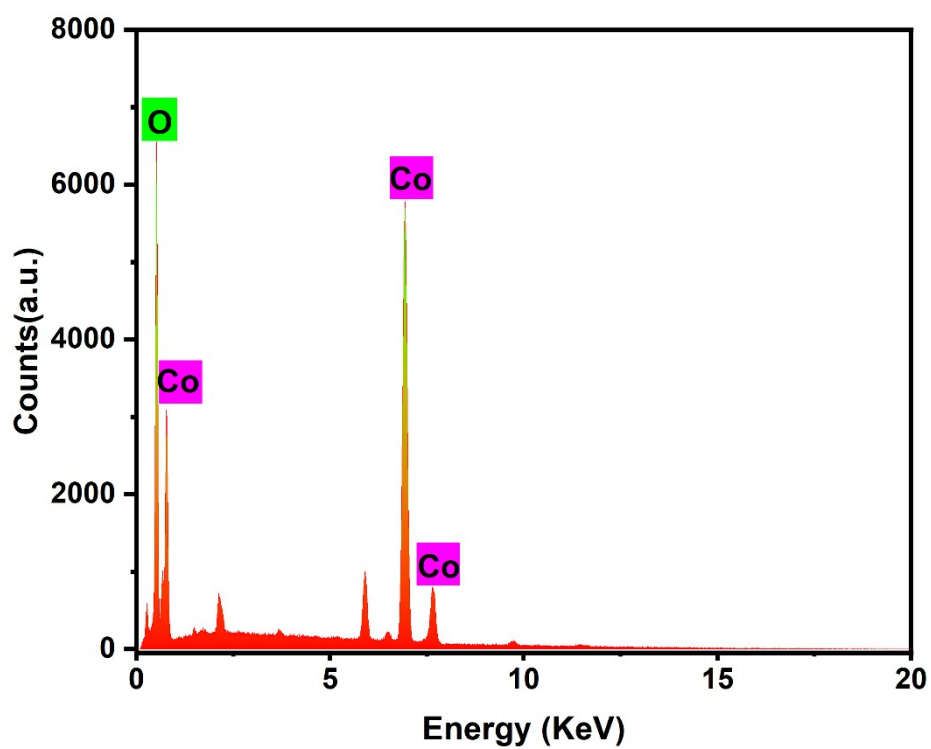

Fig S5. The EDS spectroscopy results of pristine Co<sub>3</sub>O<sub>4</sub>.

Table S2. Quantitative results for O and Co in Co<sub>3</sub>O<sub>4</sub> from EDS.

| element | wt%   | wt% sigma | At%   |
|---------|-------|-----------|-------|
| O       | 18.83 | 0.11      | 47.02 |
| Co      | 69.02 | 0.66      | 49.79 |
| Total   | 87.85 |           | 96.81 |

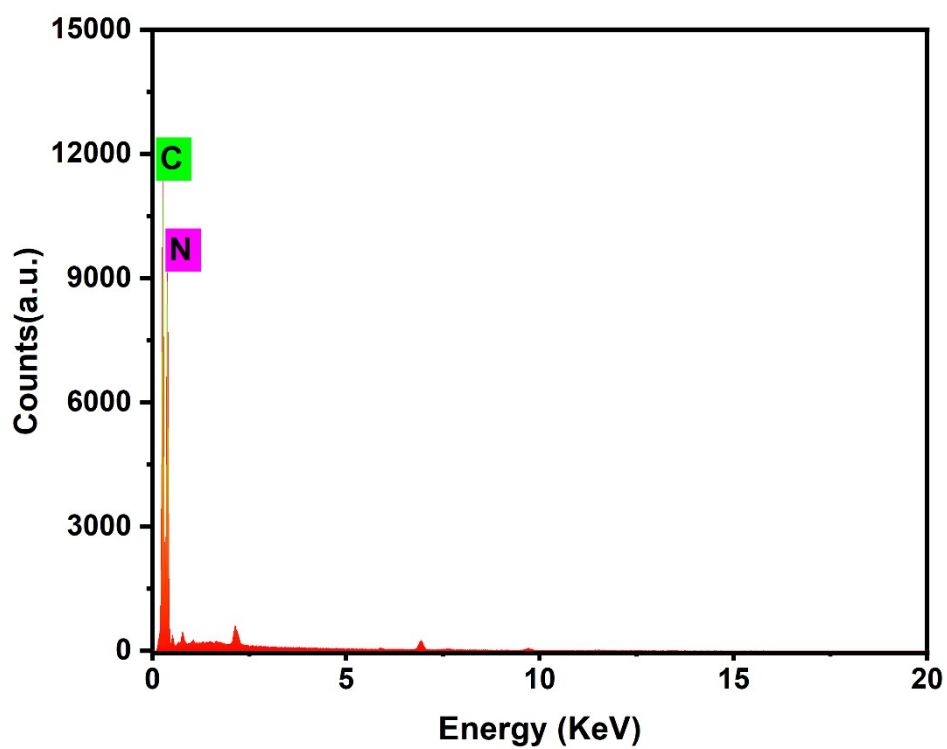

Fig S6. The EDS spectroscopy results of g-C<sub>3</sub>N<sub>4</sub>.

Table S3. Quantitative results for C N in g-C<sub>3</sub>N<sub>4</sub> from EDS.

| element | wt%   | wt% sigma | At%   |
|---------|-------|-----------|-------|
| C       | 36.11 | 0.25      | 39.76 |
| N       | 63.02 | 0.26      | 59.51 |
| Total   | 99.13 |           | 99.27 |

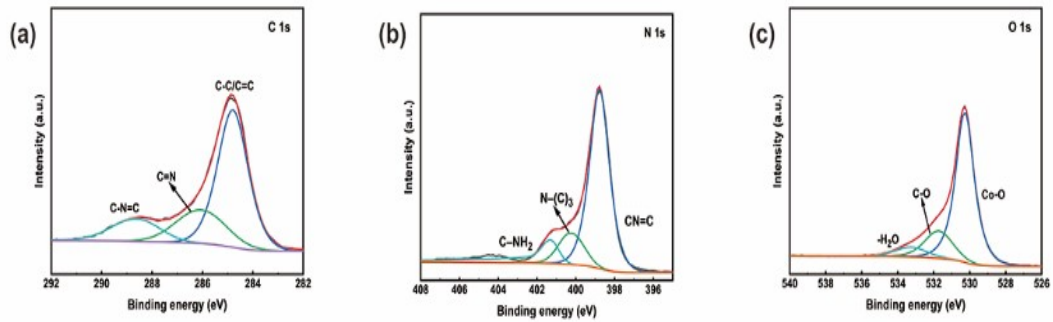

**Fig S7.** High-resolution XPS spectra of (a) C 1s region of g-C<sub>3</sub>N<sub>4</sub> composites, (b) N 1s region of g-C<sub>3</sub>N<sub>4</sub> composites, (c) O 1s region of Co<sub>3</sub>O<sub>4</sub>.

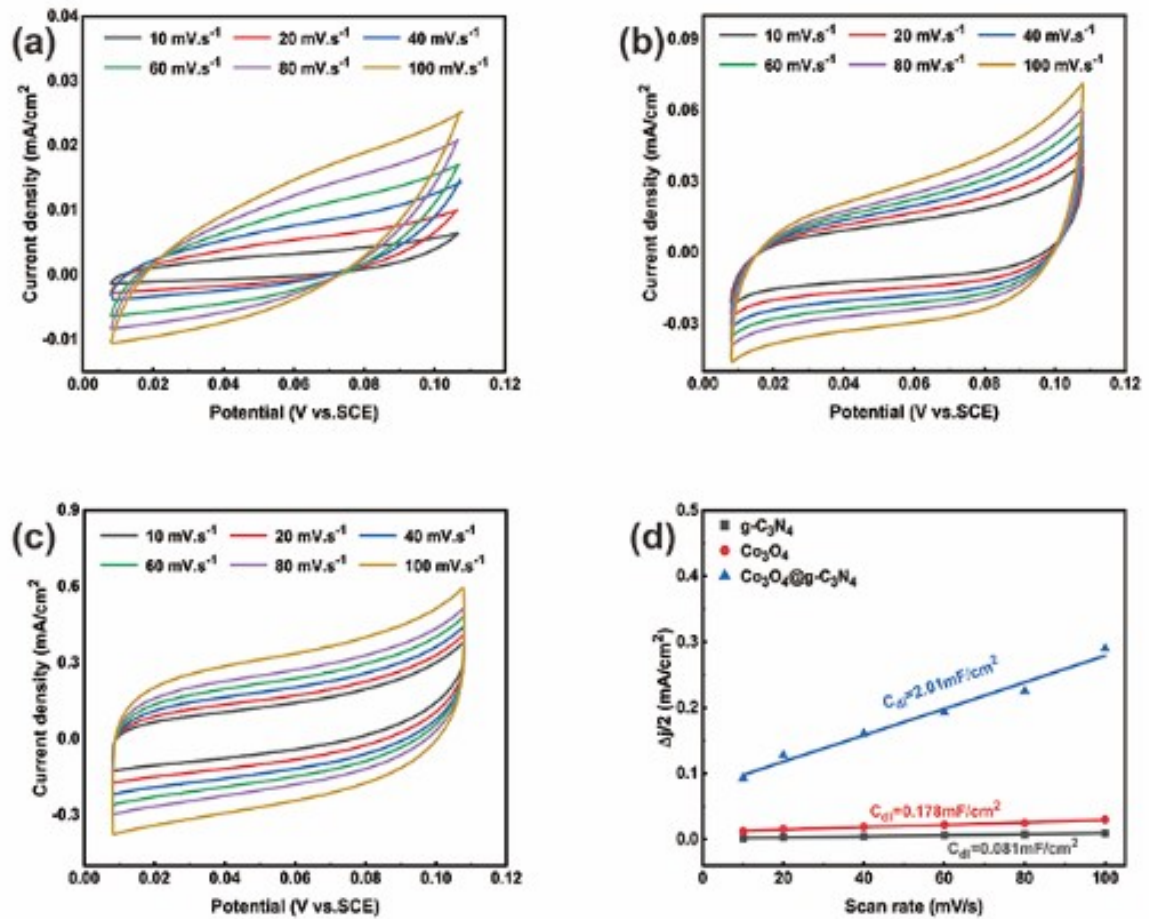

**Fig S8.** Cyclic voltammetry curves of (a) g-C<sub>3</sub>N<sub>4</sub>, (b) Co<sub>3</sub>O<sub>4</sub>, (c) Co<sub>3</sub>O<sub>4</sub>/gC<sub>3</sub>N<sub>4</sub>, (d) double layer capacitance (C<sub>dl</sub>) of the catalysts.



**Table S4.** Summary of electrochemical OER activity of catalyst.

| simple                                                          | Overpotential $\eta_{10}$ (mV) | Tafel slop (mV.dec <sup>-1</sup> ) | Mass loading (mg/cm <sup>2</sup> ) | Cdl (mF/cm <sup>2</sup> ) | ECSA(mF/cm <sup>2</sup> ) |
|-----------------------------------------------------------------|--------------------------------|------------------------------------|------------------------------------|---------------------------|---------------------------|
| g-C <sub>3</sub> N <sub>4</sub>                                 | N/A                            | 451.01                             | 1.2                                | 0.081                     | ~2.025                    |
| Co <sub>3</sub> O <sub>4</sub>                                  | 430                            | 132.09                             | 1.4                                | 0.178                     | ~4.45                     |
| Co <sub>3</sub> O <sub>4</sub> @g-C <sub>3</sub> N <sub>4</sub> | 340                            | 120.92                             | 1.1                                | 2.01                      | ~50.25                    |
| CP                                                              | 480                            | 215.24                             | N/A                                | N/A                       | N/A                       |
| Pt                                                              | 600                            | 129.21                             | N/A                                | N/A                       | N/A                       |

**Table S5.** OER poteals of the prepared catalysts comparison with some best reported.

| Sample Name                                                                       | Potentials $\eta_{10}$ [V] | Overpotential $\eta_{10}$ [V] | References    |
|-----------------------------------------------------------------------------------|----------------------------|-------------------------------|---------------|
| Co <sub>3</sub> O <sub>4</sub> @g-C <sub>3</sub> N <sub>4</sub>                   | 1.605                      | 0.340                         | This Work     |
| Co <sub>3</sub> O <sub>4</sub>                                                    | 1.691                      | 0.430                         | This Work     |
| *g-C <sub>3</sub> N <sub>4</sub>                                                  | N/A                        | N/A                           | This Work     |
| RuO <sub>2</sub>                                                                  | 1.550                      | 0.320                         | <sup>9</sup>  |
| IrO <sub>2</sub>                                                                  | 1.650                      | 0.420                         | <sup>10</sup> |
| Co <sub>3</sub> O <sub>4</sub> /N-doped-graphene                                  | 1.540                      | 0.310                         | <sup>11</sup> |
| Ni(OH) <sub>2</sub>                                                               | 1.590                      | 0.360                         | <sup>12</sup> |
| Co(OH) <sub>2</sub> @g-C <sub>3</sub> N <sub>4</sub> -5                           | 1.550                      | 0.320                         | <sup>10</sup> |
| Co <sub>3</sub> O <sub>4</sub> /P-CN                                              | 1.658                      | 0.428                         | <sup>13</sup> |
| Co <sub>3</sub> O <sub>4</sub> @BP                                                | 1.63                       | 0.400                         | <sup>14</sup> |
| Co <sub>3</sub> O <sub>4</sub> /MoO <sub>3</sub> /g-C <sub>3</sub> N <sub>4</sub> | 1.436                      | 0.206                         | <sup>7</sup>  |

\*g-C<sub>3</sub>N<sub>4</sub> did not reach at 10 mA·cm<sup>-2</sup> in this work.

**Table S6.** Peak table of Co<sub>3</sub>O<sub>4</sub>@g-C<sub>3</sub>N<sub>4</sub> composites from XPS result.

| sample | Start BE | Peak BE | End BE | Height CPS | FWHM eV | Area(P) CPS.eV | Area (N) TPP-2M | Atomic |
|--------|----------|---------|--------|------------|---------|----------------|-----------------|--------|
| O 1s   | 544.98   | 529.95  | 525.18 | 82252.74   | 1.52    | 181482.74      | 1051.2          | 18.48% |
| C 1s   | 297.98   | 288.07  | 279.18 | 56209.45   | 1.44    | 167453.45      | 2353.02         | 41.37% |
| Co 2p  | 814.98   | 780.02  | 765.18 | 62258.17   | 2.88    | 387578.48      | 444.32          | 7.81%  |
| N 1s   | 409.98   | 398.61  | 392.18 | 92042.41   | 1.59    | 203761.62      | 1839.68         | 32.34% |

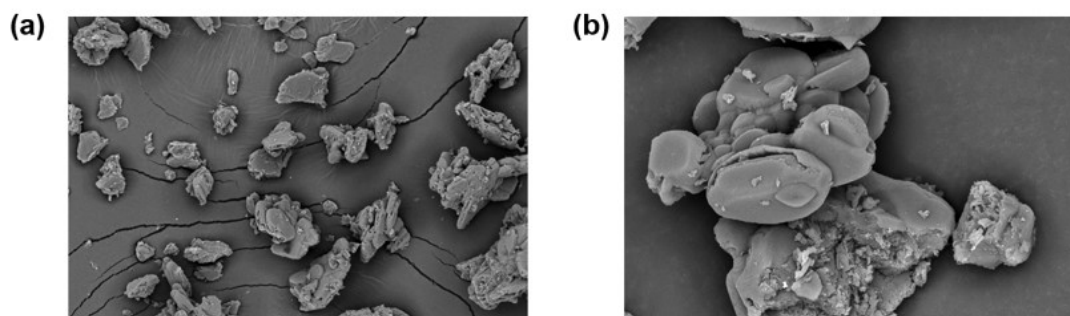**Fig S9.** SEM images of (a) 500-g-C<sub>3</sub>N<sub>4</sub> nanosheets.(b) 600-g-C<sub>3</sub>N<sub>4</sub> nanosheets.

1. A. R. Zeradjanin, J. Masa, I. Spanos and R. Schlögl, *Frontiers in Energy Research*, 2021, **8**.
2. H. Kazemi Esfeh and M. K. A. Hamid, *Journal of Electrochemical Energy Conversion and Storage*, 2016, **13**.
3. C. Schluckner, V. Subotić, V. Lawlor and C. Hochenauer, *International Journal of Hydrogen Energy*, 2014, **39**, 19102-19118.
4. P. Yang, H. Zhang and Z. Hu, *International Journal of Hydrogen Energy*, 2016, **41**, 3579-3590.
5. D. A. Noren and M. A. Hoffman, *Journal of Power Sources*, 2005, **152**, 175-181.
6. C. Thanomjit, Y. Patcharavorachot, P. Ponpesh and A. Arpornwichanop, *International Journal of Hydrogen Energy*, 2015, **40**, 6950-6958.
7. I. Ahmed, R. Biswas, R. A. Patil, K. K. Halder, H. Singh, B. Banerjee, B. Kumar, Y.-R. Ma and K. K. Haldar, *ACS Applied Nano Materials*, 2021, **4**, 12672-12681.
8. H. Deng, C. Zhang, Y. Xie, T. Tumlin, L. Giri, S. P. Karna and J. Lin, *Journal of Materials Chemistry A*, 2016, **4**, 6824-6830.
9. L. Zhang, X. Gan, X. Zhong, L. Wang, G. Feng, L. Wang, Y. Wang, X. Lv, W. Zhu and B. Zhang, *Nanotechnology*, 2022, **33**.
10. M. Tahir, N. Mahmood, L. Pan, Z.-F. Huang, Z. Lv, J. Zhang, F. K. Butt, G. Shen, X. Zhang, S. X. Dou and J.-J. Zou, *Journal of Materials Chemistry A*, 2016, **4**, 12940-12946.
11. Y. Liang, Y. Li, H. Wang, J. Zhou, J. Wang, T. Regier and H. Dai, *Nature materials*, 2011, **10**, 780-786.
12. X.-Y. Yu, Y. Feng, B. Guan, X. W. Lou and U. Paik, *Energy & Environmental Science*, 2016, **9**, 1246-1250.
13. M. Zhu, S. Yu, R. Ge, L. Feng, Y. Yu, Y. Li and W. Li, *ACS Applied Energy Materials*, 2019, **2**, 4718-4729.
14. F. Shi, K. Huang, Y. Wang, W. Zhang, L. Li, X. Wang and S. Feng, *ACS Appl Mater Interfaces*, 2019, **11**, 17459-17466.
